# Supplementary material
Source: PubMed Central journal article supplement (PMC3557757)

Figure 1. MSIT Trial Examples

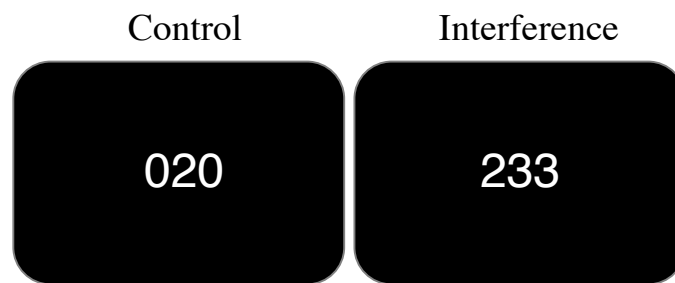

Supplement: NIHMS410462-supplement-01.pdf [file NIHMS410462-supplement-01.pdf]
